# Supplementary material for: Loss of ARID1A in Tumor Cells Renders Selective Vulnerability to Combined Ionizing Radiation and PARP Inhibitor Therapy
Source: Oxford University Press journal article supplement (doi:10.1158/1078-0432.ccr-18-4222), 2019-06-13
Supplement: 10780432ccr184222-sup-214345_2_supp_5550540_ps80xd.xlsx [file 10780432ccr184222-sup-214345_2_supp_5550540_ps80xd.xlsx]

## Sheet: Table 1
Protein Names	ARID1A+/+		ARID1A-/-		log2 FC [ARID1A-/-(IR/Con)]/ [ARID1A+/+(IR/WT)]	Sequence	Phospho (STY) site IDs
	log2 (Control Int.)	log2 (IR Int.)	log2 (Control Int.)	log2 (IR Int.)
SRRM2	20.7837	0	0	24.6027	45.3864	RLGSTGSQPNSEAESVPENVPKPPLLPPK	7396;7397
SF3B1	21.4166	0	0	22.299	43.7156	GSGVAQSPQQPPPQQQQQQPPQQPTPPK	8522;8523
DTNBP1	22.4784	0	0	20.8714	43.3498	ASPSPQPSSQPLQIHR	211;212
AP3D1	20.7071	0	0	21.3354	42.0425	GSVSQPSTPSPPKPTGIFQTSANSSFEPVK	3098;3099;3100
IFT81	22.0289	0	0	19.5005	41.5294	FGSADNIPNLKDSLEEGQVDDAGK	2628
ZC3H11A	21.3378	0	0	19.4718	40.8096	TRSWDSSSPVDRPEPEAASPTTR
SGTA	20.4454	0	0	20.1892	40.6345	HQDGLPYIDDSPSSSPHLSSK	3210;8489
ANLN	19.5675	0	0	21.0641	40.6316	DKSPVREPIDNLTPEER
ABLIM1	20.3529	0	0	20.2193	40.5722	EAEALLQSMGLTPESPIVPPPMSPSSK	7787
TRA2B	19.9966	0	0	20.4655	40.4621	LLSPAGSSGAPASPACSSPPSSEFMDVN	8787
SSFA2	20.5537	0	0	19.8078	40.3615	KMSQPGSPSPK	3797;3798;3799;8660;8661
PRR12	21.1176	0	0	19.1806	40.2982	SQDVELWEGEVVK	7231;9474
ALG1L2	19.8835	0	0	20.4043	40.2878	GIVRSPCGSPTGSPK	8019;9605
SRSF9	20.6306	0	0	19.5339	40.1645	IDEDGENTQIEDTEPMSPVLNSK
SASH3	20.346	0	0	19.7441	40.0901	AQDPAAATASSPSTPDPASAPSTTPASPATPAQPSTSGSASSDAGSGSR	3338;8539
SMN2;SMN1	20.8363	0	0	19.2312	40.0675	FQEDGSWCPMR	889;890;7916
FAM129B	20.7915	0	0	19.1551	39.9465	VLSTSSTLTR	6374;6375
FAM21A;FAM21C	19.1688	0	0	20.3151	39.4839	GPGQVPTATSALSLELQEVEPLGLPQASPSR	296;297
CCDC6	19.0193	0	0	20.1468	39.1661	SVCGHLENTSVGNSPNPSSAENSFR	4962;4963;4964;4965;4966;8935
TP53BP1	18.9531	0	0	20.1352	39.0883	SRLTPVSPESSSTEEK
PCM1	18.2409	0	0	20.7844	39.0253	RAPSPVVSPTEMNK	4871;4872;4873;4874;4875
GAPVD1	18.7479	0	0	20.0254	38.7733	FQEQECPPSPEPTRK	1298;1299;1300
SP100	18.8919	0	0	19.8101	38.702	VGVEASEETPQTSSSSARPGTPSDHQSQEASQFER	1924
SH3KBP1	20.1773	0	0	18.4804	38.6577	SPPLSPVGTTPVK	5070;5071
YBX1	19.0657	0	0	19.4793	38.5451	MLPHAPGVQMQAIPEDAVHEDSGDEDGEDPDK	4303;4304;8791
SMG6	19.0594	0	0	19.405	38.4644	SSTPLPTISSSAENTR	5557;9075
SDAD1	19.4383	0	0	18.8812	38.3195	GSPRYSPR	1812
RPRD2	18.9444	0	0	19.3617	38.3061	SGSPAPETTNESVPFAQHSSLDSR	5193;5194;5195;5196;8993
ARSE	19.0167	0	0	19.2694	38.2862	GPGQVPTATSALSLELQEVEPLGLPQASPSR	1348;1349;9606
COASY	19.0127	0	0	19.2155	38.2282	PVSSAASVYAGAGGSGSR	2971;2972;2973;8432
PKP4	20.023	0	0	18.1896	38.2126	SSPASTPSR	645;646
MICB	19.6132	0	0	18.2909	37.9041	SPTGPSNSFLANMGGTVAHK	662;663;7858;7859
TOP2B	19.5569	0	0	18.3004	37.8573	SPQMVSAIVR	4395;4396;4397
SRSF5	19.0535	0	0	18.6642	37.7177	TGSQEGTSMEGSRPAAPAEPGTLK	4643;4644;4645;4646
RYBP	18.0638	0	0	19.2165	37.2802	NLSSTTDDEAPR	5784;5785;5786;9132
RBM6	19.253	0	0	18.0018	37.2549	YDERPGPSPLPHR	1911;8184
FZD6	19.4131	0	0	17.7919	37.205	TDHGAEIVYKSPVVSGDTSPR	3247;3248
PDE4A	18.7531	0	0	18.3754	37.1285	SFSQPGLR	2958;2959
IGF2R	17.177	0	0	19.875	37.052	LQTATMETSRSPSPQFAPQK	3600;3601
ZZEF1	18.9609	0	0	17.9699	36.9309	IGEGTYGVVYK	3168;3169;8482
KLC4	17.5883	0	0	19.3358	36.9241	SIEVENDFLPVEK	6918;6919;9390
MYLK	18.8889	0	0	17.8237	36.7126	DRFSNSMESLSSR	4951;8933
NT5C3B	17.8059	0	0	18.5497	36.3556	SQALGNQNSENEILLEGDDDTLSSVDEK	8024
SLK	17.6465	0	0	18.7012	36.3478	RTGSDHTNPTSPLLVK	6684
CCDC82	18.444	0	0	17.7751	36.2191	DRHDTPDPSPR	2179;2180
NKTR	19.3562	0	0	16.7487	36.1049	GSSPTPPCSPVQPSK	218;219;220
PCM1	18.7598	0	0	17.2293	35.9891	RHESEEGDSHR	4878;4879;4880;4881
PTRF	18.7531	0	0	17.2198	35.9729	EADDDEEVDDNIPEMPSPKK	5312;5313
PRIM1	18.329	0	0	17.4857	35.8147	MPGSPVTSGYYGVRR	8247;8248
AHSA1	18.6428	0	0	17.1547	35.7975	VSSPSCDSQGLHAEEAPSSEPQSPVAQTSGWPACSTPLPLVSR
MAP1B	17.8309	0	0	17.9174	35.7483	QEASTGQSPEDHASLAPPLSPDHSSLEAK	4038;4039
NUP205	18.1314	0	0	17.1913	35.3227	ESSPIPSPTSDRK	6053;6054
PAXBP1	24.2475	21.4378	0	22.6437	25.4534	QYAMDYSNK	7575;7576;9538;9539
RBM6	22.0541	0	20.4474	23.3072	24.9139	NIMTQQKDSFEMEEVQSTEGEAPHVPATYQLGLTK	1911;8184
RIN1	22.282	0	20.8107	23.1566	24.6278	ALQADSPHSSSGMSEVHSPGEHSGQSQGPPTPPTTPK	2035;2036
PLEKHG3	22.3523	19.384	0	21.5931	24.5614	AQTLPTSVVTITSESSPGKR	912;913
HSF1	23.1645	0	21.3163	22.4801	24.3282	AASDGQYENQSPEATSPR	2013;2014;2015;2016;2017;8200
STYK1	22.5444	0	22.2943	23.9833	24.2334	TLSVAAAFNEDEDSEPEEMPPEAK	5296;5297;9011;9012;9013;9726
GINS2	21.1527	0	21.2172	23.5305	23.466	DRPGSPESPLLDAPFSR
AMPD2	20.3443	0	17.8451	20.4521	22.9513	SEARRDSTSSLQR	2489
RBSN	20.6625	0	18.7165	20.8689	22.8149	SPSQESIGAR	6665;6666;6667;6668;9324
TMPO	20.7854	0	17.7389	19.759	22.8054	KLPEPLSWRSDEEDEDSDFGEEQR	2425;2426;2427;2428;2429;8294;8295;8296
GSK3B;GSK3A	21.942	0	22.2093	22.9488	22.6815	SLKESEALPEK	4151
IRS2	20.1094	0	18.6485	20.9883	22.4492	GESAPTLSTSPSPSSPSPTSPSPTLGR	7553;9532;9533
SPTBN1	22.202	0	21.8546	22.027	22.3744	SSTPRESPCGK	88;89;90;7728
JUND	22.2274	0	22.4354	22.5579	22.35	NIHYNSVVNPNK	3677;3678;3679;8623
TMEM55A	20.9993	19.4594	0	20.7986	22.3386	EEPSQNDISPK	1690;1691;1692;1693;8107;8108
SLC9A1	20.8968	0	19.5904	20.9958	22.3021	LGPATLNLEVPTYEFTSDDMVIVG	3721;3722;3723;8630
TMPO	20.7079	0	20.3178	21.912	22.3021	KLSVPTSDEEDEVPAPK	2425;2426;2427;2428;2429;8294;8295;8296
MICALL1	20.9406	0	21.6113	22.6339	21.9632	YLSPGWGSASEEEPSR	5764;5765;5766;5767;5768;9127
IGKV3OR2-268;IGKV3-7;IGKV3D-7	20.924	0	18.3838	19.2813	21.8215	SPVGGGGPGDPADTSSSDSLTQALQLAAANEPTFFLYAEQLAR	7706
TRIM28	20.4008	20.1948	0	21.6005	21.8064	SQVAELNDDDKDDEIVFK	4660;4661;4662;4663;4664;4665;8867;8868
PDXDC1	20.0469	0	18.7438	20.3935	21.6966	MKTSVTTPSSSK	2679;2680;2681;2682;8351
OSBPL9	21.0105	0	20.5658	21.2264	21.671	FFDSEDEDFEILSL	6351;6352;6353;6354;6355;6356;9272
ARHGAP21	19.4974	18.8074	0	20.9579	21.6479	VTSFSTPPTPER	5151;5152;8986
NEDD4L	20.9068	0	18.6503	19.3544	21.6109	NRPGLSYHYAHSHLAEEEGEDKEDSQPPTPVSQR	836;837;838;839;7908;9590
CNOT2	21.5481	0	21.4555	21.4891	21.5816	SPDLGEYDPLTQADSDESEDDLVLNLQK	233;234;235;236
TNKS1BP1	21.1032	0	19.1936	19.6665	21.576	MGGAGGEGSDDDTSLT	6580;6581
KIAA0930	20.361	19.9181	0	21.0817	21.5246	LQTSLTEPMTLSK	1082;1083;7954
DENND4C	19.9141	18.4363	0	19.9852	21.4631	LGYLPVQTVLEGDNLETPSQSPQLFHDDTHSR	5223;5224;5225;5226;8999
UBR5	20.8915	0	19.7992	20.3494	21.4417	HIKEEPLSEEEPCTSTAIASPEKK	1706;1707;1708;8111
PKP3	20.6822	0	19.5785	20.2709	21.3746	MLQAISPKQSPSSSPTR	7528;7529;7530;7531;9525
CASC3	20.8077	0	19.5838	20.144	21.3678	RNLSPSQEEAGLEDGVSGEISDTELEQTDSCAEPLSEGR	3157;3158
GABRB1	20.0522	0	19.2758	20.5232	21.2997	ATSNVFAMFDQSQIQEFK	8097
FAM219A	19.9808	0	19.1563	20.4404	21.2648	TDGFAEAIHSPQVAGVPR	393;7791
OSBP	20.8817	0	18.6369	19.0077	21.2525	VVNPLIGLLGEYGGDSDYEEEEEEEQTPPPQPR	3745;3746;3747;3748;8634
SMIM1	19.9301	0	18.3305	19.5345	21.1342	YGVYEDENYEVGSDDEEIPFK	1130;1131;1132
WWC1	20.6347	0	19.3594	19.7777	21.053	KDDSDDDGGGWITPSNIK	2583;8329;8330
MAP3K6	20.1718	0	20.497	21.3771	21.052	RNSSSSSSPSERPR	3405;3406;3407;3408
TRAFD1	19.7798	19.767	0	21.0125	21.0253	AGGSPASYHGSTSPR	8458
NOP56	23.2106	22.8159	0	20.6148	21.0095	RLIDSSGSASVLTHSSSGNSLK	3086;3087
NOP56	23.2106	22.8159	0	20.6148	21.0095	SATLLYDQPLQVFTGSSSSSDLISGTK	3086;3087
ERBB2IP	20.4576	0	20.743	21.2291	20.9437	SESAPTLHPYSPLSPK	6307;6308;6309;6310;6311;6312;9268;9269
RBM17	19.5974	0	19.2382	20.581	20.9402	SAPASPNHAGVLSAHSSGAQTPESLSREGSPAPLEPEPGAAQPK	2543
GTF3C1	20.8234	0	19.7593	19.8416	20.9056	PFESSSSIGAEK	4577;4578;8849
RC3H2	19.1637	0	19.0639	20.7969	20.8966	SLSPTYIELMR	6800;6801;9357
ARVCF	20.5979	0	19.9898	20.1724	20.7805	ALVTVSRSPPGSGASTPVGPWDQAVQR	1447;8051;8052;9609
CDC42EP1	19.7529	0	18.1577	19.1802	20.7754	SRSHTSEGAHLDITPNSGAAGNSAGPK	4341;4342
MAP1A	20.3349	0	19.358	19.7916	20.7685	NSVLSDPGLDSPRTSPVIMAR	1903;1904
ZNF185	20.6896	0	21.1979	21.2107	20.7024	KADSVSSNHTLSSNATR	2748;2749;2750;8370;8371
FERMT1	18.6582	0	17.8016	19.719	20.5755	QASTDAGTAGALTPQHVR	6431;6432;9289
MAP1A	19.3517	0	18.5229	19.7205	20.5492	TQTPQLHFLDTDDEVSPTSWGDSR	1895;1896;1897
ANLN	20.2098	0	18.8112	19.1332	20.5317	ESISPQPADSACSSPAPSTGK	6880;6881;9382
PLEC	19.1539	17.7636	0	19.0978	20.4881	VVSDADDSDSDAVSDK	4844;4857;4858;4859;4860;4861;4862;4863;4864;4865;9714
FBXW9	20.2599	0	18.9196	19.1154	20.4557	STFSTNYR	2960;2961;8425
PLEKHH2	19.2126	0	19.1934	20.4042	20.4234	DASTSPPNRETIGSAQCK	5652;5653;5654
GPR39	18.8724	0	16.878	18.3809	20.3754	TYIFTFLLSSR	3171;3172;3173
SRCAP	19.704	0	18.144	18.7724	20.3324	RPSPPEPWDEEDGASCSTFFGSEER	418;419;7800
MTM1	19.8142	0	17.7105	18.1835	20.2872	ADVFPGNDSTASQDVANR	4709;4710;4711
LRBA	19.1817	0	20.5656	21.6493	20.2654	AAFLTGRYPVRSGMVSSIGYR	1865;1866;8171
EP400	19.7091	0	20.2174	20.7475	20.2392	SFSPKSPLELGEKLSPLPGGPGAGDPR	6251;6252;9254
BAZ2B	19.7601	0	17.9684	18.4342	20.226	LHSGSPPRAPPPPLEALHSGEAGR
BRD2	18.8864	18.2235	0	19.5295	20.1925	VSPASPAGSPSADFAVHGESLGDR	666;667;668
RAB11FIP5	19.4315	0	18.5239	19.2236	20.1313	SPEMSMQEDCISDIAPMQTDEQTNK	791;792;793;794;795;796;797
MAP7D1	19.9567	0	19.3896	19.4974	20.0645	AQSYPDNHQEFSDYDNPIFEK	5008;5009;5010;5011
LIMA1	22.4435	22.3303	0	19.9018	20.015	SHMSGSPGPGGSNTAPSTPVIGGSDK	2215;2216;2217;2218;2219
NOP56	21.5331	20.3066	0	18.678	19.9045	NLHQSGFSLSGAQIDDNIPR	3088;3089;3090;3091;3092;8457
RBM15	18.2531	0	17.0133	18.5826	19.8224	ANRDQDSSDDERALEDWVSSETSALPR	154;155
SNTB1	18.3822	0	18.1253	19.5617	19.8186	ELSNSPLR	4751;8890
SHROOM3	17.7205	0	18.0089	20.0846	19.7961	FFQTSGLSKMSANQVK	5934;5935
TP53BP1	19.0644	0	18.4727	19.1251	19.7168	TGSVQTPPDLESSEEVDAAEGAPEVVGPK	969;970
IRS2	18.6747	17.9995	0	19.0353	19.7105	SRSLSNSNPDISGTPTSPDDEVR	7547;7548;7549;7550;9529;9530;9531
BIRC6	19.3773	0	20.3688	20.6761	19.6845	SGLALPAIDGLDSTTCVHGASFSDSEDESCVPLLR	6892;6893
TOP2A	20.7672	20.4041	0	19.2314	19.5945	AGLESGAEPGDGDSDTTK	3591
TLE3	19.4919	0	18.8461	18.9409	19.5867	NEEPSEEEIDAPK	2182;2183
PAK4	17.4228	17.1877	0	19.2834	19.5186	KPWTSLSSESVSCPQGSLSPATSLMQVSERPR
BCLAF1	18.96	0	19.7694	20.2928	19.4834	ETQSPEQVK	1970;1971;1972;1973;8197
PKP2	18.3065	0	18.4225	19.4958	19.3797	DQVSVATSFDITDENIATKR	6419
PPP1R12A	18.7942	0	19.7719	20.2327	19.255	ASISQGPPTASR	3109;3110;8466
AFAP1	19.1594	0	20.0114	20.079	19.227	WHASLYPASGRSSPVESLK	5808;5809;5810
ZRANB2	18.7952	0	18.3778	18.7456	19.163	KPDGVKESTESSNTTIEDEDVK	3391
TOP2B	18.455	0	17.9879	18.5722	19.0393	YPLCSADAAVSTTPPGSPPPPPPLPEPPVLK	4388;4389;8804
ARHGEF1	18.8617	0	18.3669	18.5173	19.0122	ETTGSESDGGDSSSTK	3022;3023
MAP1B	18.6761	0	20.3311	20.6394	18.9844	GRTLDDMSEMVK	4054;4055
CUL4B	18.4628	0	18.2212	18.6027	18.8443	HKSESPCESPYPNEK	2936;2937;2938;2939;2940;2941;2942;2943;2944;8422
EPS8L2	20.0469	18.9349	0	17.7285	18.8405	SVTSNQSDGTQESCESPDVLDR	6745;6746;6747;9340
HNF1B	20.1318	18.0607	0	16.7496	18.8207	RVVEDEGSSVEMEQK	173;174
CDC7	18.817	0	18.5826	18.5832	18.8177	SHRSSVSSVGAR	1115;1116
REXO1	18.1583	0	18.1392	18.7879	18.8071	DTVIIVSEPSEDEESQGLPTMAR	5740
MAP4K4	17.5516	0	17.4499	18.6225	18.7241	SCSPSPVSPQVQPQAADTISDSVAVPASLLGMR	634;635
CDCA7L	20.6667	20.0137	0	18.0559	18.7088	IEEVLSPEGSPSK	1307;1308
CDC42BPA	18.5006	0	19.0332	19.1677	18.6352	ELPPAAAIGATSLVAAPHSSSSSPSK	350;351;352;7784
BMI1;COMMD3-BMI1	17.5501	0	17.9366	18.9645	18.578	HMDPPPAPVQDRSPSPR	3878;3879;3880
PRPF38B	19.6189	18.9437	0	17.8382	18.5134	EIPSATQSPISK	5199;5200;5201
MAP1S	17.9737	0	17.1799	17.691	18.4848	EAYSGCSGPVDSECPPPPSSPVHK	5247;5248;5249
MAP1B	17.8995	0	20.0479	20.5763	18.4278	ESAAPASPAPSPAPSPTPAPPQK	4044;4045;4046;4047;4048
MED24	20.0397	18.9099	0	17.27	18.3998	IHTGQKTYKCNK	532;533
CEP170	17.9757	0	18.1115	18.5328	18.397	TEMDKSPFNSPSPQDSPR	2470
PTRF	20.0767	19.1873	0	17.4298	18.3191	LTPVSPESSSTEEK	5310;5311
ANKS1A	17.8047	0	18.0626	18.4561	18.1982	RASSLNVLNVGGK	6057;6058;6059
S100A16	22.1846	22.1092	0	18.0254	18.1008	SPTPSPSPPRNSDQEGGGK	6178;6179
RAB3IP	17.887	0	18.1398	18.295	18.0421	YDNMSTMVYIK	2602;2603;2604;2605;2606;8336
KANK2	17.5502	0	19.6611	20.0979	17.987	LPDSPALAK	2964;8428
RASGEF1B;RASGEF1A	17.4905	0	17.0151	17.0159	17.4913	AQPFGFIDSDTDAEEERIPATPVVIPMK
LMNA	24.5405	22.5868	22.9177	26.448	5.484	MDLPEGPVGGPTAEMYLRER	3459;3460;3461;3462;3463;8555;8556
FOXK1	23.2877	21.1278	19.6319	22.7603	5.28831	AGDSAVLVLPPSPGPR	4319;4320;4321;8793
OSBPL11	22.1083	19.1826	18.2051	20.182	4.90255	LCGLGLAYEVYTRGAISSTQTIPLKWLAPER	6514;6515;6516;6517
TAF9	22.5674	18.0829	22.7691	23.1035	4.81896	SGSSPEVDSK	1671;1672;1673;1674;8102;8103;8104
WDR13	20.2883	17.9015	18.3154	20.593	4.66431	DNSPEPNDPEEPQEVSSTPSDKK	6673;6674
ZC3H13	19.8976	17.2304	17.3422	18.7877	4.11264	RSASPDDDLGSSNWEAADLGNEER	5137;5138
TANC1	21.0135	17.6615	20.4466	21.1852	4.09057	MITVSNQEGDTIRQTQVR	6602;6603;6604;6605
CTTN	20.3272	17.5267	17.8509	19.1268	4.07636	SSSDTNESEIK	4775;4776;4777;9710
FAM129A	21.6975	18.2087	22.0222	22.566	4.03263	MTSVAKVYYSQTTQTESRPLMGPGIR	6559;6560;6561;6562;9312
NDRG2	21.629	19.3696	19.8143	21.565	4.01019	SLGSVQAPSYGARPVSSAASVYAGAGGSGSR	423;424;7801;7802
BUD13	22.0247	19.4459	19.6892	21.1204	4.0099	YQEDSDPERSDYEEQQLQK	6435;6436;9292
SRRM2	22.6042	21.5571	20.8103	23.6987	3.93552	LFDEEEDSSEK	7268;7269;9480
OSBPL3	20.5251	18.4356	18.6873	20.5117	3.91382	KPIETGSPK	6717;6718
HDAC1	23.6432	21.3254	22.8479	24.4244	3.89432	SPGEYINIDFGEPGAR	4735
ATM	21.616	17.8781	20.0175	20.1357	3.85607	MADHLEGLSSDDEETSTDITNFNLEK	4676;4677;9704
SHROOM3	20.5734	17.1099	22.0747	22.4252	3.81396	AQQQEEQGSVNDVKEEEK	5932;5933
MICAL1	21.3801	19.9891	18.9431	21.3501	3.79797	MDSNIQGIENPGFEASPPAQGIPEAK	5915;5916;5917
USP32	20.1999	18.1664	17.6634	19.408	3.77798	VELPSEEQVSGSQGPSEEK	2983;2984;2985;2986
LSR	20.956	17.7134	20.3911	20.8608	3.71224	TLENSPISSCDTSDTEGPVPVNSAAVLK	5605;5606;5607;9088
PLEKHG3	22.0414	18.8332	21.9963	22.4346	3.64645	TKPLASVTNANTSSTQAAPVAVTTPTVSSGQATPTSPIK	914;915;916;917;7919
PHF2	19.7065	17.4288	17.1029	18.4561	3.63089	EAQTLDSQIQETSI	3283;8513
SRSF10	26.4899	24.8972	24.5747	26.4875	3.5055	ATEDGEEDEVSAGEK	3324;3325
MAP2	20.3329	19.9247	18.4289	21.4294	3.4087	TQEISRPNSPSEGEGESSDSR	3580;3581;8590;8591;8592;8593;8594;8595
HJURP	21.2265	18.2128	20.1923	20.5498	3.3712	SSSTRSGGGDLTLGLEPSEEEAPR	2787;2788;2789;8380
IQSEC1	20.278	18.6991	19.0122	20.8036	3.37034	LSSSLGR	146;147;148;149;150;151
FOXK1	24.2044	21.8716	23.598	24.6335	3.36826	ISMSEVDLNVAAPK	4326;4327;4328;8795
ARHGEF7	19.6369	19.285	17.6711	20.6597	3.34061	LGPGGLDDRYSLVSEQLEPAATSTYR	1111;1112
ZDHHC5	20.4253	18.2114	19.1867	20.2978	3.32504	TCNSPQNSTDSVSDIVPDSPFPGALGSDTR	2609;8337
MLLT4	21.7247	19.2117	20.1034	20.9153	3.32493	AQYHLKIGSSEQR	1011;1012;1013
STK10	20.3188	17.5218	22.5212	23.0453	3.32112	KLTSDEEGEPSGK	3347;3348;3349;3350
NAB2	21.138	18.7775	20.278	21.219	3.30148	GIQLYDTPYEPEGQSVDSDSESTVSPR	4946;4947;4948;4949
ANKHD1	21.0795	19.3364	19.528	21.0843	3.29938	HEDEQALLDQNSQTPPPSPFSVQAFNK	1668;1669;1670;8101
DDR1	19.6383	17.942	17.8368	19.4353	3.29484	ASPVTSPAAAFPTASPANK	9583;9584
ATXN2	21.8698	20.4729	21.0087	22.8627	3.25089	RKGSDDDGGDSPVQDIDTPEVDLYQLQVNTLR	2225;2226;2227;2228;2229;2230;2231;2232;2233;8250
KCNJ10	19.6002	18.9721	19.1354	21.754	3.24673	VVQRSSLSRER	817;7902
TMEM87A	23.2689	21.5388	22.9095	24.4262	3.2467	IFDEVMGCFSDSPPQSPTFPEAGHTSLYDEDK	5839
CWC22	25.4576	23.1142	25.5033	26.4011	3.24126	SWSPPPEVSR	1220
XRCC4	21.6392	19.0716	21.3903	22.0272	3.20448	TFQQIQEEEDDDYPGSYSPQDPSAGPLLTEELIK	4692;4693;4694;4695
RTN4	19.3122	18.3406	18.8172	21.0487	3.20309	REAALPPVSPLK	6853;6854;6855;6856;6857
OSBP	21.3179	18.642	20.5906	21.1167	3.20199	FVPEVDTFTRTTNSTLSPLK	3745;3746;3747;3748;8634
SEC16A	21.73	19.4048	19.6917	20.5464	3.17996	SPVVSGDTSPR	2077;2078;2079;2080;8213;8214
TMPO	22.8875	21.747	20.8579	22.8861	3.16874	HKRIHTEEK	2430;2431;8297
HID1	20.7431	18.091	19.6634	20.1096	3.09827	GSYGSDAEEEEYR	5645;5646;5647;9096
KLC3	20.1825	18.8628	18.2946	20.0626	3.08768	MQNNSSPSISPNTSFTSDGSPSPLGGIK	5330
IGF2R	21.1505	18.867	20.3982	21.1551	3.04038	AQSPSYVISTGVSPSRGSLR	3597;3598;3599
C11orf30;EMSY	21.3305	18.8812	20.1966	20.766	3.01861	LAEGEEEKPEPDISSEESVSTVEEQENETPPATSSEAEQPK	2004;2005;2006
NOP14	19.9816	18.2875	20.3429	21.6339	2.98511	HFRHDTPDSSPR	1878;8174;8175
IRS2	19.4301	19.0597	19.4772	22.0913	2.98444	GEFSASPMLK	7555;7556;7557;7558;7559;9534
PDPK1;PDPK2P	19.4471	18.5791	18.3071	20.3571	2.91805	ESLAQGPDAATTDELSSLGSDSEANGFAER	1871
BAIAP2L1	21.2076	19.7849	21.1194	22.5909	2.89418	SQSSEGVSSLSSSPSNSLETQSQSLSR	7145;7146;7147;9438;9439;9440
DSP	22.0436	20.2149	21.7143	22.7761	2.89049	LPSQPKEVQTLWCTDSQVSETTTRISLLK	3630;3631;3632
BUD13	23.362	21.8087	21.9653	23.2881	2.87618	SNTAGSQSQVETEA	6434;9291
IRS1	19.8659	18.3499	17.9957	19.3537	2.87389	GLPSTASGR	3895;3896
IRS1	19.3987	19.0054	18.6409	21.1145	2.86682	EGHETPMDIDSDDSK	3889;3890;3891;3892;3893;3894;8685;8686
EDC4	21.1869	19.2456	19.521	20.4461	2.86633	ASSDGEGTMSRPASVDGSPVSPSTNR	5320;5321;5322;5323;9016;9017
TFG	21.4134	19.0745	21.7103	22.2188	2.84736	MNSTGGQTPR	6066;6067
RBSN	19.9546	18.8032	18.7871	20.4828	2.84714	HVSPVTPPR	6669;6670;6671;6672
SENP6	20.3327	18.221	18.6658	19.3555	2.80135	MAPTPIPTRSPSDSSTASTPVAEQIER	2500;2501;2502;2503
EML4	18.8847	17.244	18.274	19.433	2.7998	DSFIENSSSNCTSGSSKPNSPSISPSILSNTEHK	1196;1197
MYH10	19.6478	18.6425	18.3742	20.1462	2.7773	SPPQVVKSEEMSK	3920
SRGAP1	19.5592	18.3033	19.887	21.3983	2.76725	APQQQPPPQQPPPPQPPPQQPPPPPSYSPAR	2455;8301;8302
MYL12A;MYL12B;MYL9	22.7563	20.5651	23.5193	24.0951	2.76699	SRSESETSTMAAK	2921;8418
NOS1AP	21.5877	20.0485	19.9727	21.1998	2.76637	AHSSPASLQLGAVSPGTLTPTGVVSGPAATPTAQHLR	3277;3278
IRS1	21.5425	19.8006	19.866	20.8814	2.75726	RVIHFVSGETMEEYSTDEDEVDGLEK	3897;3910;8691
ADAR	19.4816	17.965	18.4573	19.6852	2.74451	NLALSRESLVV	2595;2596;8333;8334;8335
UTP14A	23.567	22.101	22.8188	24.0883	2.7355	AATAARPPAPPPAPQPPSPTPSPPRPTLAR	6482;6483
AFF4	20.6996	19.9718	19.4189	21.417	2.72594	SRSESDLSQPESDEEGYALSGR	7130;7131
KIF21B	17.9381	17.641	16.8721	19.2783	2.70322	DLASVPPELTASRQSFR	3274;3275;8510
CAMSAP3	21.8414	19.4483	20.7667	21.0542	2.68065	SQDGASQFQEVIR	7026;7027;7028;7029
BAIAP2	21.7003	19.9834	21.5283	22.4824	2.67098	RSTAPSAAASASASAAASSPAGGGAEALELLEHCGVCR	1185;1186;1187;7982
SPTBN1	22.161	19.8647	20.5534	20.906	2.64885	ANSDDERPVASDNDDEK	88;89;90;7728
TRA2A	20.0286	18.9818	18.7326	20.3105	2.62477	TPLSFTNPLHSDDSDSDERNSDGAVTQNK	8887;8888
RRAS2	19.7904	18.4965	20.9395	22.2682	2.62262	PALAPKPTSQTPPASPLSK	4276;8784
ZC3H4	20.9666	19.7759	20.268	21.6905	2.6132	SPQTLAPVGEDAMKTPSPAAEDAREPEAK	3020;3021
RPRD2	20.3233	18.3017	19.6582	20.1988	2.56223	FHSMASRLTKTEELEK	5197
SYNPO	20.2002	17.8147	20.4705	20.6278	2.54291	LVEQANSPK	5775;5776;9131
PRR12	20.5966	18.6137	20.7694	21.3167	2.53014	VQDTSNTGLGEDIIHQLSK	7232;7233;7234;7235
KRT18	21.7207	20.1462	22.2575	23.2094	2.52644	YAEQIMMIK	3494;8560
KRT18	20.7668	20.1236	20.503	22.3861	2.52635	LVMAQHMIRDIQTLLSRMETLPYLQCR	3491;3492;3493
IRF2BP1	20.4991	18.5983	20.3087	20.9332	2.52518	LYPSEAKSHSSESLGILK	5643
TANC2	22.16	20.3107	21.8589	22.5293	2.51957	AEGEWEDQEALDYFSDK	2902;2903;2904
C2CD5	21.3983	20.4542	20.6358	22.1982	2.50645	PGPPLSPEIRSPAGSPELR	5629;5630;5631;9093
MYH10	23.5413	21.6495	22.7245	23.338	2.50526	GATAGWAVTVYDKPASFFK	3916;3917;8692
UBE4B	20.7395	18.3413	19.5017	19.6004	2.49696	QGSADPGSR	3380;3381;3382;3383;3384;3385;3386;3387
FOXK1	24.566	23.2187	23.5279	24.6618	2.48112	EATNTTSEPSAPSQDLLDLSPSPR	4324;4325;8794
EHBP1L1	20.7674	19.3095	20.0876	21.0649	2.43524	GNIYYQSYEHRSPSPNIR	1944
LRRFIP2	20.2395	18.6713	19.2776	20.1332	2.4238	SHSRQASTDAGTAGALTPQHVR	1484;1485;1486
SEPT9	21.0815	20.3913	19.6974	21.4255	2.41836	QEPAEEYETPESPVPPARSPSPPPK	7140
DKFZp586F0420;MAP3K7	21.2405	19.5127	20.3281	21.002	2.40178	ISYTPPESPVPSYASSTPLHVPVPR	3189;3190;3191
PHF2	21.8897	20.217	21.0768	21.8036	2.39946	AASLTEDR	3284;3285;9652
PPP1R12A	21.4272	19.3281	21.6757	21.9577	2.38099	LHDFLAHSSEESEETSSPPR	3106;3107;3108;8463;8464;8465
YBX3	20.9754	19.0985	20.247	20.7362	2.36604	AAAAAALSGAGTPPAGGGAGGGGAGGGGSPPGGWAVAR	3664
NUCKS1	22.3826	20.5249	19.0694	19.5258	2.31404	ELPLTQPPSAHSSITSGSCPGTPEMR	6648;9321
POC5	20.5168	18.8069	19.4608	20.0501	2.29916	GCDSPDPDTSYVLTPHTEEK	5833;5834;5835
RAPGEF2	19.5667	18.9596	19.1439	20.8247	2.28792	TAFDEAIAELDTLSEESYK	2572;2573;2574;2575;8327
AFF4	20.3574	18.4218	20.7907	21.1288	2.27364	EEPPSPIEATPPQSLLEK	7121;7122;7123;7124;7125;7126;7127;7128;7129
EEF2	25.5483	23.5683	24.3283	24.6099	2.26163	TGSGSPFAGNSPAREGEQDAASLK	8601
ATN1	21.036	20.1464	19.7451	21.1116	2.25605	RNVPQEESLEDSDVDADFK	4217;4218;4219;8769;9691
SCAF1	18.9448	18.1553	18.2616	19.717	2.2449	YSEQMTYGISSEK
MAP1B	20.8053	19.1727	21.5543	22.1417	2.22	FVPAENDSILMNPAQDGEVQLSQNDDK	4052;4053
GRIPAP1	20.6877	19.0105	20.3694	20.9087	2.21649	NQDLSQATDHQKNLGSSK	26;27;28
MYL12A;MYL12B;MYL9	22.8876	21.2807	23.7484	24.3489	2.20749	PVSTLLIYEVSNR	2921;8418
TGFB1I1	22.025	21.7039	21.4693	23.3458	2.19761	RTDALTSSPGR	3179;3180;3181
BRD2	24.9151	23.2998	24.1771	24.7524	2.19051	SVDFDSLTVR	666;667;668
DPYSL2	22.0373	19.957	23.041	23.1326	2.17197	LKSEDGVEGDLGETQSR	848;849;850;7910;7911;7912
WDR44	18.1165	17.4237	18.0121	19.4862	2.16691	AGGSPASYHGSTSPR	5087
SRRM2	22.9471	22.7116	21.8047	23.7182	2.14899	ATVTPSPVK	9501
LIMD1	20.0372	17.942	20.2091	20.2499	2.13611	DPYTEQTISLFQAMKK	1463;1464
XRCC1	19.5674	19.3659	19.1348	21.0626	2.12934	VRVSTETSSPLSPPAVPPPPVPVLPGAVPSQTER	2188;2189;8242;8243
FRA10AC1	21.5894	19.5737	20.7904	20.9007	2.12603	GLDIESYDSLERPLRK	5432;5433;5434;5435
MYO9B	21.4523	20.6446	20.6391	21.9442	2.11279	DPAQPMSPGEATQSGARPADR	3047
ZDHHC5	18.3111	17.5136	17.4123	18.7266	2.11185	VELPSEEQVSGSQGPSEEK
RICTOR	18.977	17.58	19.2189	19.9306	2.10864	SRSGSSQELDVKPSASPQER	5374;5375;9730
NFIC	22.3015	21.6697	21.6869	23.1575	2.10233	VNPVTSLSENYTCSDSEESSEK	3537
GMIP	19.7263	18.9717	18.8832	20.2028	2.07419	ASQSRPNSSALETLGGEK	7016;7017
GAPVD1	22.8949	21.0465	22.3516	22.5719	2.06866	STSQGSINSPVYSR	1284;1285;1286;1287;1288;1289;1290
KAT6A	20.684	18.8236	20.8365	21.0389	2.06272	LGEASDSELADADK	1524;1525
SNTA1	20.4429	18.4823	19.4351	19.5272	2.05265	STPESDVGAGGEEEAGSPPFSPPAGGGVPEGTGAGGLAAGGTGGGPDR	4681;4682
EPHA2	20.5769	18.6651	21.2523	21.3919	2.05143	SPTPESSTIASYVTLR	3833;3834;3835;3836;8673
SLC9A1	20.8082	18.9213	20.6194	20.7678	2.03528	VSVSPGR	3721;3722;3723;8630
RAF1	19.8788	18.4825	19.3203	19.9488	2.02489	EAPSPLMIHSPQMSQFQSLTHQSPPQQNVQPK	2767;2768;8375;8376
ARHGEF2	21.2019	19.2959	21.8798	21.9684	1.99456	TPAAAAAMNLASPR	6095;6096;6097
TXNRD3	20.811	18.8536	20.3016	20.3264	1.98225	ADSQDAGQETEK	880;881
HNRNPC	22.4365	21.6121	22.6299	23.7669	1.96139	YSSQDADEQDWEFQK	1125;1126;1127;1128;1129
SH3KBP1	20.6823	19.577	19.9026	20.753	1.95582	QGSITSPQANEQSVTPQR	5069
SSFA2	20.3708	18.9704	19.5115	20.0612	1.95009	GQASSPTPEPGVGAGDLPGPTSAPVPSGSQSGGR	3829;3830
PKP3	20.2253	18.4586	19.7205	19.9025	1.94858	DHYQDPVPGITPSSSSR	7520
NRG2	21.4451	20.6569	21.0213	22.1784	1.94524	TPKDSPGIPPSAGAHQLFR	2140;2141;2142
PKP3	23.0175	22.8644	22.2812	24.0577	1.92961	ADFTVVAGDEGSSTTGGSSEENK	7524;7525;9787
MTCL1	19.7701	18.0876	19.8259	20.0618	1.91848	RLSSAHNGGSAFGAAGYGGAQPTPPMPTRPVSFHER	7542;7543
DLGAP4	20.0053	19.3126	20.7003	21.917	1.90932	VTLYNTDQDGSDSPR	543;544;545;7835
SH3BP1	18.4834	17.3919	17.9295	18.7344	1.89641	SPPPESVDTPTSTK	7507;7508
BCLAF1	18.6648	18.537	18.1654	19.9275	1.88984	ADYDTLSLRSLR	1966
SRRM1	26.6875	24.9339	25.8769	26.0127	1.88932	LQQTVPADASPDSK	1048;1049
PDXDC1	21.1222	19.644	21.2062	21.6166	1.8887	AENAEGQTPAIGPDGEPLDETSQMSDLPVK	2679;2680;2681;2682;8351
IRS2	18.6849	18.2794	19.8284	21.3075	1.88447	SFGTRPLSSGFSPEEAQQQDEEFEK	7551;7552
HSP90AA1	22.6934	21.4184	22.8128	23.4205	1.88271	TPTSSPASSPLVAK	3520
RPS6KB1	18.6315	18.3699	18.885	20.4649	1.84158	AGGPATPLSPTR	3756;3757;8639
XRN2	20.4011	19.6725	19.7046	20.8114	1.83537	TDCEPVGLEPAVEQSSAASELAEASSEELAEAPTEAPSPEAR	6628;6629;6630;6631;6632;9320
SRGAP2	20.4003	19.6169	20.9531	21.9869	1.81715	WEKICSTQDTSVEVYEHINSMSLDIIMK	29;30;31;7713;7714
MIEF1	21.0536	19.7293	20.9041	21.3819	1.80213	ALSYASLDKEDLLSPINQNTLQR	1086
LSR	20.1108	19.5478	20.5228	21.7485	1.78872	DTLSNPQSPQPSPYNSPKPQHK	5614;5615
DSG2	21.109	19.3323	21.2217	21.2243	1.77935	NDKSEEEQSSSSVKK	4764;4765;4766;4767
BIN1	19.2025	18.2851	19.9847	20.8354	1.76814	RAHTPTPGIYMGR	3076;3077;3078;8455
SMARCAD1	21.9904	21.8697	19.0147	20.651	1.757	ASEDNRVPSPPPTGDDGGGGGR	1631;1632;1633;1634;1635
PCIF1	21.2417	20.5475	20.5165	21.5756	1.75331	FTSGAFLSPSVSVQECRTPR	6719;6720;6721;6722;6723;6724;9332
FXR2	24.9502	23.2713	24.2713	24.3418	1.74947	PVSSAASVYAGAGGSGSR	4175;4176;8759
PHLDB1	19.6805	19.4585	19.7467	21.2679	1.74325	ADTSQEICSPR	5572;5573
CANX	22.9733	21.2599	23.0786	23.1003	1.73509	LEPVSPPSPPHTDPELELVPPR	3793;3794;8657
TJP3	19.6847	18.5173	20.8787	21.4418	1.73038	ASPAPGSGHPEGPGAHLDMNSLDR	3370;3371;3372;8543
USP34	19.2184	18.4851	19.9432	20.933	1.7231	TCNSPQNSTDSVSDIVPDSPFPGALGSDTR	5426;5427;5428
FCHO2	18.7541	18.6984	19.0336	20.6934	1.71545	GRPSSPRTPLYLQPDAYGSLDR	4565
UTRN	20.2432	18.5846	20.4943	20.5354	1.69963	REEDEPEERSGDETPGSEVPGDK	2487;2488;8309
ZNF185	20.9622	19.3166	21.1981	21.2413	1.68878	REEDEPEERSGDETPGSEVPGDK	2747
RPTOR	18.7309	18.6948	18.5415	20.1879	1.68251	LGAPENSGISTLER	5726
NDRG1	22.4817	21.5785	22.3756	23.1198	1.64731	TKGTSSFGKR	6028;6029;6030;9195;9196
SH3GL1	21.1125	20.2556	20.8237	21.5813	1.6145	GGVTGSPEASISGSK	6420;6421
PTPN12	21.6811	21.5671	21.1884	22.6874	1.61301	SISSPVSK	4476;4477;8825;8826
CTNND1	20.9935	20.6686	21.1818	22.4686	1.61171	GDHNRTLDRSGDLGDMEPLK	1508;8064
C9orf142	19.2577	18.9112	20.0109	21.2716	1.60723	TLSPTPSAEGYQDVR	6478
DOCK7	19.8016	19.6408	20.0293	21.4734	1.60493	ASSDGEGTMSRPASVDGSPVSPSTNR
MAPK1	24.2462	23.4626	24.4804	25.2965	1.59957	GQPVLTPPDQLVIANIDQSDFEGFSYVNPQFVHPILQSAV	8672;9674
SCAF1	20.5984	20.456	20.7646	22.218	1.59581	TSPASLDFPESQK	6785;6786
DDB2	19.6473	19.2676	19.3089	20.5195	1.59026	ESSPLYSPTFSDSTSAVK	59
TMPO	21.8489	20.8044	23.5314	24.0772	1.59025	ESEVCPVPTNSPSPPPLPPPPPLPK	2425;2426;2427;2428;2429;8294;8295;8296
SYMPK	23.3418	23.7257	23.3986	22.1756	-1.60691	NQASDSENEELPKPR	6082;9203
SYMPK	23.3418	23.7257	23.3986	22.1756	-1.60691	TSMGGTQQQFVEGVR	6082;9203
AATF	22.8708	23.4153	22.2187	21.1374	-1.62577	VGEDEDGSDEEVVHNEDIHFEPIVSLPEVEVK	6963;6964;6965
AATF	22.8708	23.4153	22.2187	21.1374	-1.62577	TLSSPSLQTDGIAATPVPPPPPPK	6963;6964;6965
RBM26	20.1357	20.3218	19.7087	18.2687	-1.62609	TPGSRQASPTEVVER	251;252
BIN1	20.6606	21.1	20.3292	19.0859	-1.68258	SRSSSVGSSSSYPISPAVSR	3076;3077;3078;8455
SP100	21.0312	22.0032	21.428	20.7023	-1.69774	SPGLVPPSPEFAPR	1925;1926;1927
RSL1D1	23.1042	23.1838	23.1562	21.4896	-1.74624	ASRRSDSASSEPVGIYQGFEK	2929;2930;8420
RSL1D1	23.1042	23.1838	23.1562	21.4896	-1.74624	MVIQGPSSPQGEAMVTDVLEDQK	2929;2930;8420
AKAP12	22.7863	23.1574	20.2126	18.7658	-1.81793	DSGSDTASAIIPSTTPSVDSDDESVVK	4420;4421;4422
AKAP12	22.7863	23.1574	20.2126	18.7658	-1.81793	EGESSRGTEPLWTPEPGSDK	4420;4421;4422
AKAP12	22.7021	23.3142	20.6068	19.3957	-1.82337	GSNPLDGRDSPSAGGPVGQLEPIPIPAPASPGTRPTLK	4398
AKAP12	22.7021	23.3142	20.6068	19.3957	-1.82337	SHSQASLAGPGPVDPSNR	4398
CAMK2D	21.929	22.5759	20.627	19.4397	-1.83422	SATRPSPSPERSSTGPEPPAPTPLLAER	1594;1595;1596;8073;8074;8075
SRPR	21.106	21.9399	20.8911	19.8886	-1.83638	FLSHSTDSLNK	3528;3529;3530
TOP2A	20.0447	20.55	19.4212	18.0668	-1.85971	SASPDDDLGSSNWEAADLGNEER	3596
AKAP12	22.327	23.1585	19.7629	18.7217	-1.87277	VNLEESSGVENSPAGARPK	4402;4403;4404;4405;4406;4407;8807;8808
AKAP12	22.327	23.1585	19.7629	18.7217	-1.87277	TPVASTHSISSAATPDR	4402;4403;4404;4405;4406;4407;8807;8808
PRKAR2A	18.3139	19.7524	18.6052	18.1405	-1.90311	PNAGSEEISSEDDELVEEK	3625;3626
RBM5	18.3383	19.0507	18.6768	17.4763	-1.91289	MWTGYKILIFSYLTTEIWMEKQYLSQR	4186;4187;9690
RPS6	21.6464	22.5987	22.3383	21.3709	-1.91972	DGDVAGPGSSPGGPEEWPDAK	4277;4278;4279;4280;4281;4282;4283;8785
TRA2B	21.9141	22.659	22.7177	21.5249	-1.93777	KPDGVKESTESSNTTIEDEDVK	4293;4294
TRA2B	21.9141	22.659	22.7177	21.5249	-1.93777	MEDSMDMDMSPLRPQNYLFGCELK	4293;4294
HNRNPUL2-BSCL2;HNRNPUL2	23.9351	24.5892	24.8275	23.5381	-1.94345	TSETSISPPGSSIGSPNR	2702;2703;8354
HNRNPUL2-BSCL2;HNRNPUL2	23.9351	24.5892	24.8275	23.5381	-1.94345	AQSPSYVISTGVSPSR	2702;2703;8354
ACACA	22.245	22.2519	21.3874	19.418	-1.97615	GYSSPEPDIQDSSGSEAQSVK	4616;4617;4618
CBX3	18.0324	19.9502	18.243	18.1713	-1.98949	AVSPPHLDGPPSPR	4636
NOP58	22.4681	23.6116	22.9928	22.0844	-2.05187	ATSTSPNSQSSK	7496;7497;7498;9516
NOP58	22.4681	23.6116	22.9928	22.0844	-2.05187	KPSPAASPATK	7496;7497;7498;9516
SRRM1	23.144	23.3569	22.6493	20.7931	-2.0691	SAESPTSPVTSETGSTFK	1026;1027;1028
SRRM1	23.144	23.3569	22.6493	20.7931	-2.0691	SEVYDPSDPTGSDSSAPGSSPER	1026;1027;1028
DDX42	21.4294	21.9464	20.6843	19.1279	-2.07343	TGSGSPFAGNSPAR	5621;5622;5623;9092
RANBP2;RGPD4;RGPD3;RGPD8;RGPD1;RGPD2;RGPD5;RGPD6	21.7599	21.9795	22.4561	20.5742	-2.10147	SVSPTTEMVSNESVDYR	4132;8744
FTH1	26.6929	27.4996	27.5555	26.2534	-2.1089	DLTHSDSESSLHMSDR	2383
FTH1	26.6929	27.4996	27.5555	26.2534	-2.1089	DPTSLLGVLQAEADSTSEGLEDAVHSR	2383
LEO1	21.8589	22.2317	21.5656	19.7751	-2.16341	EMEHNTVCAAGTSPVGEIGEEK	5963
AGFG1	19.7505	21.048	20.6328	19.7442	-2.18613	HAASYSSDSENQGSYSGVIPPPPGR	1273;1274;8008
AKT1S1	23.5938	24.2636	23.8894	22.3669	-2.19237	RNLSPSQEEAGLEDGVSGEISDTELEQTDSCAEPLSEGRK	6111;6112;9219;9220
AKT1S1	23.5938	24.2636	23.8894	22.3669	-2.19237	GLVAAYSGESDSEEEQER	6111;6112;9219;9220
MBD1	19.2443	20.0068	20.2842	18.8471	-2.19963	IDEDGENTQIEDTEPMSPVLNSK	431
MYBBP1A	18.2074	18.5723	18.8778	17.0393	-2.20343	ARNSGTQSDGEEK	6422
SRRM2	21.1845	22.132	20.4642	19.208	-2.20373	GESTVLSFVSWLTLSGPEQSSVRGPSTENQEAK	7266;7267
MFAP1	21.7668	22.8348	22.5959	21.4569	-2.20703	IMNMIEEIKTPASTPVSGTPQASPMIER	8779
MFAP1	21.7668	22.8348	22.5959	21.4569	-2.20703	TSLITEEEDSTSEVLDEELK	8779
CLASP1	19.5968	21.1543	20.6326	19.9659	-2.2242	LSSKLSAVSLR	2330
TRA2B;TRA2A	24.6414	25.6963	25.8314	24.5839	-2.30238	DNSPEPNDPEEPQEVSSTPSDKK	4288;4289;4290;9694
TRA2B;TRA2A	24.6414	25.6963	25.8314	24.5839	-2.30238	GLVAAYSGESDSEEEQER	4288;4289;4290;9694
VDAC2	18.2061	19.5819	18.8461	17.8865	-2.33538	KRETDDEGEDD	319
RLF	18.6051	20.6384	18.8382	18.5117	-2.3598	VRHDSPDPSPPR	4631;4632;8863
RPL31	20.1113	22.136	20.7912	20.4338	-2.38208	GGSISVQVNSIKFDSE	1227
SGTA	20.3176	21.3054	20.5604	19.1354	-2.41281	PLISLHLVDSDSSLAK	3208;8488
MISP	20.1083	20.3426	20.3753	18.1564	-2.45312	TVSTSSTSGNDFEETK	5667
ANP32B	23.9732	25.1875	25.0207	23.7587	-2.47641	LRSPSNDSAHR	9200
ANP32B	23.9732	25.1875	25.0207	23.7587	-2.47641	MQNNSSPSISPNTSFTSDGSPSPLGGIK	9200
CHAMP1	19.4226	19.6228	20.1107	17.8177	-2.49325	MTLSPPHSPQGAAPR	6237;9249
OGFR	19.9923	22.4468	21.4216	21.3572	-2.5189	NSPLTVPMFLSLFSR	6996
VDAC1	18.2955	20.7406	19.3512	19.2285	-2.5677	EEPLSEEEPCTSTAIASPEKK	3741
BAZ1B	20.8229	22.5212	22.1841	21.251	-2.6314	QIQPSPPWSYDQSYQYLGSIASPSVHPATPISPGR	7161;7162;9455
CERS2	22.9412	23.8573	23.3625	21.6404	-2.63819	SRSFDYNYR	2642;2643;2644;8345
CERS2	22.9412	23.8573	23.3625	21.6404	-2.63819	FIHQQPQSSSPVYGSSAK	2642;2643;2644;8345
SRRM1	20.9174	22.5781	21.7372	20.7507	-2.64733	TGNESGSNLSDSGSVK	7952
PHACTR4	20.0852	20.4649	21.2095	18.9297	-2.65952	ASEENLLSSSSVPSADRDSSPTTNSK	5704;5705;9114;9115
H2AFX	18.8029	19.4195	19.9671	17.8904	-2.69327	DLHGSQGSLALSVADR	3639
PCBP1	18.602	20.3931	20.3684	19.3916	-2.76791	MGGMGTPGDLHAACPSTTRR	4895
TRA2B	21.4759	21.82	21.8051	19.2627	-2.88658	RPAPAVSPGSWKPGPPGSPR	4284;4285;4286;4287;8786
HNRNPU	18.6532	20.5033	24.7002	23.3483	-3.20204	KFSPSHSSMSHLEAVSPSDSR	854
HID1	19.5928	20.856	21.0849	19.0891	-3.25905	SSPSLDSGDSDSEELPTFAFLK	5649;9097
PLA2G4A	20.1507	21.3282	20.2504	18.1351	-3.29288	TPSSSSTLAYSPR	4068;4069
ZBTB21	20.942	21.9007	22.113	19.7546	-3.31697	GDRSPEPGQTWTR	7224;7225;9470
RASA4B;RASA4	21.9067	22.4675	22.6953	19.8277	-3.42845	VLSPESLSCTEIPIPLNERHSPK	1359;1360;1361;1362
UBE2O	18.7221	21.3346	19.6827	18.8341	-3.461	KQSLGELIGTLNAAK	6596;6597
GPHN	20.3975	21.9529	22.8084	20.8767	-3.48713	ILIPSDIESSK	2146;2147;2148;8229;8230
SRRM1	20.3315	21.4045	21.1361	18.1303	-4.07882	RSDSPEIPFQAAAGPSDGLDASSPGNSFVGLR	1035;7947
CERS4	17.9492	21.3951	19.8523	19.1617	-4.13656	RTFQQIQEEEDDDYPGSYSPQDPSAGPLLTEELIK	2635;2636;2637;2638
HNRNPUL1	18.4146	20.3949	20.3957	17.7234	-4.65258	ASWESLDEEWRAPQAGSR	332;333
SRRM2	23.5229	24.487	23.9532	18.7715	-6.14576	NDKSEEEQSSSSVKK	7272;7310;7311;7312;7313;9489;9490;9491
SRRM2	23.5229	24.487	23.9532	18.7715	-6.14576	GSDDDGGDSPVQDIDTPEVDLYQLQVNTLR	7272;7310;7311;7312;7313;9489;9490;9491
SRRM1	16.8769	20.5258	20.6859	18.1537	-6.18117	KSSTGSISNVLFSTQDPVEDAVFGEATNLK	1050;1051;1052
SRRM2	22.9455	23.184	25.6562	18.4176	-7.47714	SDSPESDAER	7349;7350;7351;9497
SRRM2	22.9455	23.184	25.6562	18.4176	-7.47714	SRTGSESSQTGTSTTSSR	7349;7350;7351;9497
PSMC3	0	16.6979	15.9734	15.3986	-17.2727	SSPGQPEAGPEGAQERPSQAAPAVEAEGPGSSQAPR	1999
ZMYND8	20.2896	20.6776	17.017	0	-17.405	KPSPQPSSPR	125;126;127
TCOF1	0	17.498	19.0779	18.6642	-17.9116	MSLEQEEETQPGRLLGR	1772;8125
ITGB4	0	17.8111	21.0474	20.9422	-17.9163	MGQTKSTSSGGGNR	3640;3641;3642;3643;3644;8608;8609
CCAR2	18.0576	18.2282	17.8395	0	-18.0102	MERSPPQSPGPGK	5730;5731;5732;5733
CMTR1	0	17.9847	19.2061	19.1152	-18.0757	KLSGDQITLPTTVDYSSVPK	5159;5160;5161;8988
TIAM1	0	17.0331	20.0124	18.9471	-18.0983	RDSSESQLASTESDKPTTGR	4612
ATXN2L	0	17.9097	21.0363	20.6627	-18.2833	GPSPAAASPEGSPLRR	2730;2731;8359
SH3D19	0	16.6683	19.5111	17.8566	-18.3228	TLSQSSESGTLSSGPPGHTMEVSC	745
CIC	0	18.1259	19.5762	19.3655	-18.3366	LSPSPTSQR	302;303;7770;7771
DOCK5	0	17.3239	19.4386	18.2982	-18.4643	LVSPETEASEESLQFNLEK	6766;6767;6768
MAP1S	0	18.2967	20.1942	19.9512	-18.5397	YSDVEVPASVTGYSFASDGDSGTCSPLRHSFQK	5253;5254;5255
RCC2	18.6829	18.9958	18.3375	0	-18.6503	DETFGEYSDNEEK	7053;7054;7055;7056;7057
WAC	19.4089	19.4655	18.6203	0	-18.6769	RSPSPYYSR	382
SF3B1	19.3409	19.6439	18.4153	0	-18.7182	LMHNASDSEVDQDDVVEWK	8524;8525
ZNF592	20.2232	20.9118	18.0633	0	-18.752	EEPLSEEEPCTSTAIASPEKK	2657;2658;2659
TCF20	17.3488	18.6118	17.521	0	-18.784	SLPLQTSHALGYYPDPTFPAMAGWGGRGSYQR
DDX21	19.3942	19.4296	18.7763	0	-18.8116	AGSPRGSPLAEGPQAFFPER	6896;6897
GPR39	0	18.5932	21.2603	21.039	-18.8146	GPPTPRTTPTMSEEPPLDLTGK	3174;3175;8483;8484
SSFA2	17.4789	18.7892	17.5744	0	-18.8847	GRGPSPEGSSSTESSPEHPPK	3806;3807;3808;3809;8664;8665
HDAC4	0	18.7368	20.5699	20.4141	-18.8926	IRSVTVNHMSDNR	4253;4254;4255
GTF3C4	18.6707	19.5763	18.012	0	-18.9177	QYPEVIKYLSRNGIMDISR	7204
CFAP54	18.1991	18.2615	18.8572	0	-18.9196	PGLIEIPLGSLADPAAEDEGDGSPAGAEDSLEEEASSEGEPR	512;7824
STARD3	19.4996	19.6713	18.7602	0	-18.9318	RGSLSNAGDPEIVK	2912;2913;2914
KIF13B	0	18.8733	21.7344	21.6531	-18.9546	IISPGSSTPSSTRSPPPGRDESYPR	2589;2590
DEK	18.8712	19.4883	18.3424	0	-18.9595	DGLHFLPHASSSAQSPCGSPGMK	3924;3925
PTCD3	19.4181	20.1255	18.2693	0	-18.9767	APSSSAEAKSK	6167;6168;6169;6170
NEURL4	18.5082	19.8246	17.6784	0	-18.9948	SFHFDPLSSGSRSSSLK	2813;2814
DNMT1	18.615	18.7512	18.9882	0	-19.1244	SLSNSNPDISGTPTSPDDEVR	3791
LAD1	18.5531	19.5364	18.1775	0	-19.1608	NVMSAFGLTDDQVSGPPSAPAEDR	1853;1854;8169
FAM120A;C9orf129	0	19.0521	20.9749	20.8503	-19.1767	SVPNTPLRPNQQSVVNSSFSELFVK	618
SMARCC1	20.3376	21.0818	18.5519	0	-19.2962	EALSNLTALTSDSDTDSSSDSDSDTSEGK	6090;6091;6092;9209;9210
ARHGAP27	0	18.6676	20.565	19.9336	-19.299	RDGTGGVTGHFTFTLHLETPKP	581;582;583
DDX42	18.3003	19.4099	18.1921	0	-19.3018	ANSLGDLYAQK	5621;5622;5623;9092
DAXX	18.0634	19.1954	18.2454	0	-19.3774	SDAEEDGGTVSQEEEDRKPK	7099
LRRC47	19.6306	20.3791	18.6345	0	-19.3831	LQNSDDDEK	5741;5742;9124
OSBPL8	0	19.0039	20.4908	20.0018	-19.4928	SRASPVSR	6553;6554;6555;6556
TOPORS	19.5608	20.4163	18.6993	0	-19.5548	FPSPHPSPAK	6910
NDRG2	19.7554	19.841	19.5046	0	-19.5902	DGVMEMNSIEPAK	426;427;428;429;430;7803;7804
ACIN1	18.4637	18.7571	19.4184	0	-19.7119	TPSSEEISPTK	1733;1734;1735;1736
MPHOSPH8	18.7509	20.1707	18.3228	0	-19.7426	DLAFEVPERGSRPASPAAK	6383
RPS6KB2	19.1117	19.4968	19.4356	0	-19.8206	ATQASQEY	2391;8286
RANGAP1	19.2102	20.1382	18.9403	0	-19.8683	LGASNSPGQPNSVK	3989;3990;3991;8716
FARP1	18.0582	19.4234	18.6005	0	-19.9656	AALMTPGTGAPPAPGDFSGEGSQGLPDPSPEPK
MFAP1	0	19.408	21.0329	20.4138	-20.027	LVSFHDDSDEDLLHI	8779
PBRM1	16.7247	17.7955	18.9795	0	-20.0504	SEEEVESDDEYLALPAR	5551;5552
RASL10A	19.338	19.3969	19.9926	0	-20.0515	MMQTVRRMELK	6068
RPLP2	19.1968	19.4785	19.7922	0	-20.0738	IGSMSSVTSNK	3480
CPSF2	0	19.8932	19.0513	18.8612	-20.0832	GSDALRPPVPQGEDEVPK	7079;7080;7081
DKC1	17.9403	19.0543	18.9708	0	-20.0849	EVSDDEAEEKEDKEEEK	3265;3266;3267;8509
SP110	22.5397	22.6652	20.011	0	-20.1365	DSSGSVSPNTLSQEEGDQICLYHIR	2441;2442;2443;8298
SP110	22.5397	22.6652	20.011	0	-20.1365	SQASMVINSDTDDEEEVSAALTLAHLK	2441;2442;2443;8298
AKAP12	19.7968	21.3418	18.6087	0	-20.1537	RSASADNLTLPR	4433;4434;8814
ESF1	17.7285	19.6878	18.2173	0	-20.1767	RADLNQGIGEPQSPSRR	6730
SRRM1	19.2315	19.5407	19.8738	0	-20.183	TLSPTPSAEGYQDVR	1070;1071;1072;1073;7951
EIF3B	0	19.3708	19.0448	18.1622	-20.2533	VSPGLPSPNLENGAPAVGPVQPR	4246;4247
SLC9A7	17.8757	18.6893	19.548	0	-20.3616	RHDSSGSGHSAFEPLVASGVPASFVPK
HELZ	20.9483	21.047	20.3165	0	-20.4152	SPSLSPSPPSPLEK	2927;2928
SRRM2	19.7859	21.216	19.0904	0	-20.5204	SPSVSSPEPAEK	7359
CHD4	19.0591	20.1797	19.511	0	-20.6316	VASPSQGQVGSSSPK	585;586;587;588;7840;7841;7842;7843;7844
AKAP12	18.4379	20.6011	18.4824	0	-20.6456	KSPLIESTANMDNNQSQK	4411;4412
SSFA2	0	20.6081	19.5944	19.5286	-20.6739	NSDGGSDPETQK	3804;3805
REPS1	19.2087	20.039	19.8532	0	-20.6834	SVVSDLEADDVK	6135;6136;9226;9227;9228
GAPVD1	0	20.401	19.6311	19.3464	-20.6857	ASSHSSQTQGGGSVTK
SRRM2	0	18.7101	25.7986	23.8021	-20.7066	DSAIPVESDTDDEGAPR
KLF3	18.1476	19.9532	18.9027	0	-20.7083	SPSGGAAGPLLTPSQSLDGSR	4261;4262;9692
SRRM1	19.7722	20.205	20.3026	0	-20.7354	SPSPPLPTHIPPEPPRTPPFPAK	1037;1038;1039;1040;1041;7949
BAZ1B	18.2637	19.6849	19.3164	0	-20.7376	ACASPSAQVEGSPVAGSDGSQPAVK	7159
WDR33	0	18.5403	19.1901	16.8861	-20.8443	SSLGQSASETEEDTVSVSK	1276
RUNX1	0	18.9151	22.1348	20.1856	-20.8643	PALDCSQVSPPRPATSPENNASLSDTSPMDSSPSGIPK	2805;2806;8384;9641
CHTF18	18.8413	19.3417	20.3847	0	-20.8852	STSQGSINSPVYSR	638;639;640;641
ENO1	19.3238	20.1291	20.2323	0	-21.0376	NQGGYGGSSSSSSYGSGR	3505
KLC3	0	20.5051	22.583	22.0461	-21.042	PASPAQVQSSQDGGCPK	5334;5335;5336;9020
VCAN	0	20.5754	22.2847	21.8113	-21.0488	RPSESDKEDELDK	1666;1667;8099;8100
PHRF1	0	20.504	18.6157	17.9492	-21.1704	MKTPVQYSQQQNSPQK	717;718
EDC4	20.0816	20.8383	20.4205	0	-21.1772	RRSIQDLTVTGTEPGQVSSR	5324;5325;5326;5327;5328;9018;9019
FASN	0	19.2506	19.0948	17.1372	-21.2082	SQSSGSSATHPISVPGAR	747
SRRM2	19.3083	20.9323	19.6767	0	-21.3008	KADTTTPTPTAILAPGSPASPPGSLEPK	7297;7298;7299;7300;7301;7302
AKAP12	0	20.5016	18.0853	17.2787	-21.3083	PFSAPKPQTSPSPK	4425;4426;4427;8810
DENND4C	19.7669	20.4782	20.6722	0	-21.3835	PSDVGNLDDFAESDEDEAHGPGAPEAR	5223;5224;5225;5226;8999
NEURL1	0	21.1165	22.5966	22.3282	-21.3849	IGSPPKTPVSNVAATSAGPSNVGTELNSVPQK	3340;3341
NAB2	18.8921	20.1712	20.2016	0	-21.4807	VDEGAGDSAAVASGGAQTLALAGSPAPSGHPK	4950
FAM83F	18.7712	20.3472	20.1115	0	-21.6875	EPSYPMPVQETQAPESPGENSEQALQTLSPR	5863
HSPD1	18.3173	20.1121	19.9441	0	-21.7389	MPEMHFKTPK	3564
PARP12	0	20.2858	19.9134	18.448	-21.7512	QMNMSPPPGNAGPVIMSIEEK	2449;2450;2451;2452;2453;8300
TOMM70A	21.291	21.7359	21.6667	0	-22.1116	KPSPSESPEPWKPFPAVSPEPR	3357
TOP2B	20.0481	20.7587	21.4588	0	-22.1694	AQSGSDSSPEPK	4388;4389;4390;8804;8805;9697
SRRM1	0	18.9676	19.9591	16.7297	-22.197	NNMTASMFDLSMKDKSR	1063
PIAS2	0	20.134	20.8936	18.7105	-22.317	IAQEIASLSK	84
EPRS	0	22.2737	20.8884	20.7925	-22.3695	ALSGRASPVPAPSSGLHAAVR	3514;3515;3516;3517;3518;8570
SSFA2	0	19.1373	20.7154	17.4665	-22.3862	LYTLVTYVPVTTFKNCHHQ	3802;3803;8663;8666
KLC3	0	21.9492	20.8479	20.4038	-22.3932	MVIQGPSSPQGEAMVTDVLEDQK	5331;5332
SAP30	0	20.7876	20.8876	19.2261	-22.449	MASTISAYKEKMK	3313;3314;8516
BRD2	20.2042	20.6715	22.1171	0	-22.5845	RKLSSSSEPYEEDEFNDDQSIK	666;667;668
KDM2A	19.1276	21.2664	20.6483	0	-22.7871	ALEEGDGSVSGSSPRSDISQPASQDGMR	2836;2837
CFAP221	0	21.2457	21.8153	19.8237	-23.2373	LPSSPVYEDAASFK	5026;5027;5028
SRRM1	0	20.3085	20.3536	17.4232	-23.2389	PFMLPPVAASSLRNDSSSSNR	1070;1071;1072;7951
HSP90AB1;HSP90AB2P	0	22.0277	21.712	19.0708	-24.6689	DNIQPTTE	3526;3527
ZNF92;ZNF117;ZNF429;ZNF678	20.4198	21.8527	23.3831	0	-24.816	QRSPSPAPAPAPAAAAGPPTR	8014
CCNK	20.7648	24.5065	25.7618	0	-29.5035	DIQRPDSEHGLSPDSENFDWK	2410;2411;2412
CCNK	20.7648	24.5065	25.7618	0	-29.5035	LSTTPSPTSSLHEDGVEDFRR	2410;2411;2412
SHANK2	0	17.5217	17.7099	0	-35.2316	PVVSDDDSEEEQEEDR	7254;7255
CIC	0	17.5987	17.648	0	-35.2467	RPQTPPKIDYLLPGPGPAHSPQPSK	311
XIRP1	0	17.2846	18.2793	0	-35.5639	SLAALDALNTDDENDEEEYEAWK	5424;5425
ZFPM1	0	17.6592	18.0216	0	-35.6808	RKTSSDDESEEDEDDLLQR	5687
DUSP10	0	17.7921	18.019	0	-35.8111	GPALTPIRDEEWGGHSPRSPR	546;547
SHB	0	17.7939	18.0238	0	-35.8177	GSVSHSECSTPPQSPLNIDTLSSCSQSQTSASTLPR	4920;4921;4922;4923
PRKAR1A	0	18.3039	17.5951	0	-35.8989	QNPSRCSVSLSNVEAR	2979
MCC	0	18.0004	17.9372	0	-35.9376	MFGGPGTASRPSSSR	292
GIGYF2	0	18.4009	17.6851	0	-36.086	LSVGSVTSRPSTPTLGTPTPQTMSVSTK	1422;1423;1424;1425;1426;8040;8041
RCC1	0	16.7366	19.5212	0	-36.2578	VEMSGPVTVLTRQTTAAELDSHTPALEQQTTSSEK
SEPT9	0	18.285	18.2311	0	-36.5161	APSDSSLGTPSDGRPELR	7139
TIMELESS	0	18.2609	18.2994	0	-36.5603	WSPPSITTSSETSSSSSKK	7246
PUS1	0	18.7294	17.9282	0	-36.6575	NHHLPDSSDSSTSAYR	2156;8232
RAPGEF6	0	17.2645	19.4829	0	-36.7474	LDSDFNISSHSELENSSELK
ALMS1	0	18.059	18.6975	0	-36.7565	ERSPSPLRGNVVPSPLPTR	60;61;7719
POMGNT2	0	17.8025	18.9579	0	-36.7604	PGPTPSGTNVGSSGRSPSK	9147;9148;9149;9150
RRM2B	0	18.0133	18.7652	0	-36.7785	SPQPDPVDTPASTK
MAP3K2	0	17.6282	19.5159	0	-37.1441	IPHGDPQSLDPPEVSNAK	7468;7469;7470;7471;9511
KIAA1429	0	19.243	18.0221	0	-37.2651	ANTLSHFPIECQEPPQPARGSPGVSQR	5265
YWHAZ	0	19.0001	18.3636	0	-37.3637	SDAEEDGGTVSQEEEDR	4296
STIP1	0	18.5156	18.9249	0	-37.4405	KRSESPPAELPSLR	3871
ARFIP1	0	18.0495	19.4593	0	-37.5089	SPVQEASSATDTDTNSQEDPADTASVSSLSLSTGHTK	4204;8766
SNRNP70	0	19.1368	18.3821	0	-37.519	GAEAFGDSEEDGEDVFEVEK
PACSIN1	0	18.5757	18.9519	0	-37.5276	SPQEPSPPSPPVSLISALVR	2207;2208;2209;9631
MATR3;DKFZp686L22104	0	18.4072	19.129	0	-37.5362	LLTAAELLLDYDTGSEEAEEGAESSQEPVAHTVSEPK	736;737
RPTOR	0	19.0879	18.4992	0	-37.5871	NGFPHPEPDCNPSEAASEESNSEIEQEIPVEQK	5727;5728;9117;9118
SART1	0	18.9647	18.6969	0	-37.6616	SGMVSSIGYR	3176
TSC1	0	18.1997	19.6908	0	-37.8905	RPDTTAPLTDR	9193;9194
EIF4G1	0	19.5262	18.6519	0	-38.1782	ALSYASLDK	1787
CDC42BPG	0	17.1244	21.0833	0	-38.2077	EIKCSPSESPLMEK	5273;5274;5275;5276
KIAA1598	0	19.1157	19.2218	0	-38.3375	LLAASGSNSPTRSESPEPAATCSLPSDLTR	908
MDC1	0	19.4417	18.8982	0	-38.3399	YSPTSPTYSPTSPVYTPTSPK	4804;4805;8904;8905;8906;8907
REEP4	0	19.4962	18.8586	0	-38.3548	NMMPSSFAMKGNIVLTDYEYVILNILR	6738;9338;9339
F2RL1	0	19.8967	18.4925	0	-38.3892	RFTPPSTALSPGK	4241;4242;4243
LRBA	0	20.1126	18.5614	0	-38.674	SEHSHSTTLPR	1860
LSR	0	18.2757	20.425	0	-38.7007	IISPGSSTPSSTRSPPPGR	5618
GMIP	0	18.6549	20.0521	0	-38.707	IYYVGYSQGTTMGFIAFSTMPELAQK	7020
LRRFIP1	0	18.1508	20.6299	0	-38.7806	ANTLSPVR	5004
LEO1	0	20.4346	18.5532	0	-38.9878	TLSDISNASSSFGWLSLDGDPTTNVTEGSQVPERPPK	5965;5966;5967;9185
CLN3	0	19.4495	19.6859	0	-39.1354	ESAAPASPAPSPAPSPTPAPPQK	0;1
FAM21A;FAM21C	0	19.1158	20.134	0	-39.2498	APSRQDVYGPQPQVR	301;7769
BLOC1S2	0	19.471	19.8834	0	-39.3544	EGTGQQERESPRPLQLPGAEGPAISDGEEGGGEPGAGGGAAGAAGAGR	5373;9030
BCLAF1	0	19.267	20.1252	0	-39.3922	NSPLDCGSASPNK	1968;1969
TMF1	0	20.4197	19.1951	0	-39.6147	EEEEGISQESSEEEQ	2369
RTN4	0	20.2987	19.3327	0	-39.6314	SHSLSPTHREDGQNITPK	6858
REPS1	0	19.9438	19.9308	0	-39.8746	PLPTFPTSECTSDVEPDTR	6145;6146;6147;6148;9231
CHTF18	0	21.1038	19.1186	0	-40.2224	SASPHDVDLCLVSPCEFEHR	642
UBE2O	0	21.2443	19.1791	0	-40.4235	TRSWDSSSPVDRPEPEAASPTTR	6600;6601
TRIP10	0	20.1032	20.4689	0	-40.5721	TFQQIQEEEDDDYPGSYSPQDPSAGPLLTEELIK	3040;3041;3042;3043
SSFA2	0	19.9741	20.7183	0	-40.6924	SFSASQSTDREGASPVTEVR	3800;3801;8662
CCAR2	0	21.9924	18.8022	0	-40.7946	PAETPVATSPTATDSTSGDSSR	5729;5730;5731;5732;5733
TP53BP1	0	20.1368	20.7131	0	-40.8499	KAEGVALTNATGAVESTSQAGDRGSVSSYDR	998;999;7934
BCL9L	0	20.1148	21.2166	0	-41.3314	ADTTTPTPTAILAPGSPASPPGSLEPK	5562;5563;9077
CHD4	0	20.9095	20.5857	0	-41.4953	SLPELDRDKSDSDTEGLLFSR	585;586;587
ST13	0	20.6672	21.0645	0	-41.7317	GTPSQSPVVGR	2210;2211;2212
CHAMP1	0	22.0279	22.0598	0	-44.0877	STDVGFTPPSSPPTRPR	6208;6209;6210
